# Supplementary material
Source: PubMed Central journal article supplement (PMC5783725)
Supplement: NIHMS920783-supplement-supplement_1.pdf [file NIHMS920783-supplement-supplement_1.pdf]

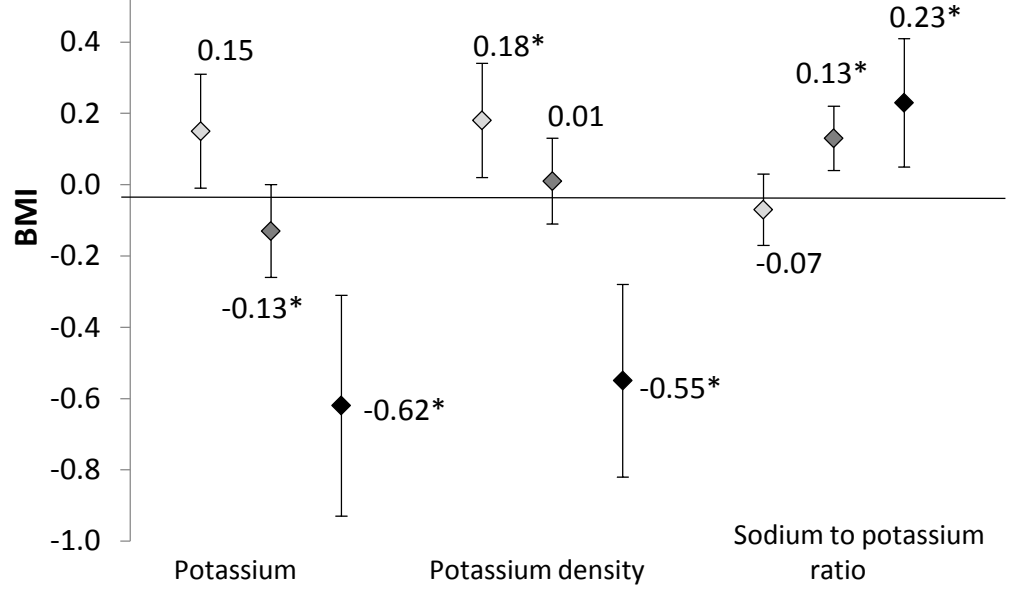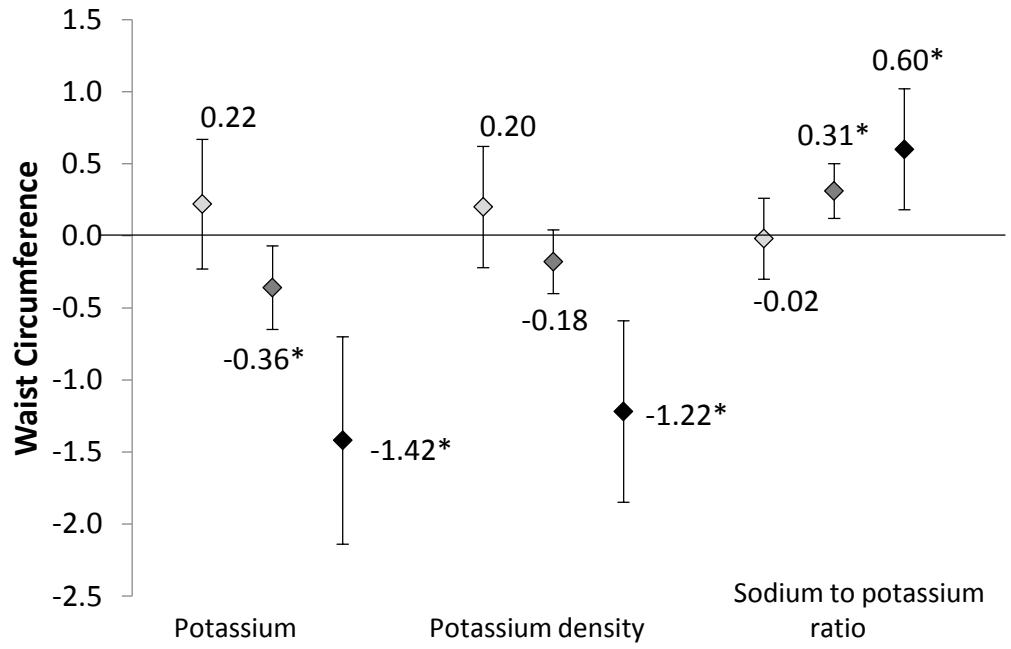

Table S1. Associations of dietary potassium, potassium density, and sodium to potassium ratio with body mass index and waist circumference, stratified by nativity/years in the US, HCHS/SOL.

|                   | Body Mass Index (kg/m <sup>2</sup> ) |             |                               |              |         |              | Waist Circumference (cm)       |             |                               |              |         |              |
|-------------------|--------------------------------------|-------------|-------------------------------|--------------|---------|--------------|--------------------------------|-------------|-------------------------------|--------------|---------|--------------|
|                   | Foreign born, < 10 years in US       |             | Foreign born, 10+ years in US |              | US born |              | Foreign born, < 10 years in US |             | Foreign born, 10+ years in US |              | US born |              |
|                   | Beta                                 | 95% CI      | Beta                          | 95% CI       | Beta    | 95% CI       | Beta                           | 95% CI      | Beta                          | 95% CI       | Beta    | 95% CI       |
| Potassium         |                                      |             |                               |              |         |              |                                |             |                               |              |         |              |
| Model 1           | 0.01                                 | -0.11, 0.12 | -0.15*                        | -0.23, -0.07 | -0.38*  | -0.56, -0.20 | 0.12                           | -0.17, 0.41 | -0.24*                        | -0.45, -0.03 | -0.87*  | -1.32, -0.41 |
| Model 2           | 0.15                                 | -0.01, 0.31 | -0.13*                        | -0.25, -0.00 | -0.62*  | -0.92, -0.31 | 0.22                           | -0.23, 0.67 | -0.36*                        | -0.64, -0.07 | -1.42*  | -2.13, -0.70 |
| Potassium density |                                      |             |                               |              |         |              |                                |             |                               |              |         |              |
| Model 1           | 0.19*                                | 0.02, 0.35  | 0.03                          | -0.09, 0.15  | -0.55*  | -0.82, -0.27 | 0.24                           | -0.20, 0.68 | -0.19                         | -0.43, 0.05  | -1.28*  | -1.94, -0.63 |
| Model 2           | 0.18*                                | 0.03, 0.34  | 0.01                          | -0.10, 0.13  | -0.55*  | -0.82, -0.28 | 0.20                           | -0.23, 0.62 | -0.18                         | -0.40, 0.04  | -1.22*  | -1.85, -0.59 |
| Sodium:Potassium  |                                      |             |                               |              |         |              |                                |             |                               |              |         |              |
| Model 1           | -0.07                                | -0.17, 0.03 | 0.16*                         | 0.06, 0.27   | 0.25*   | 0.07, 0.42   | -0.03                          | -0.30, 0.25 | -1.47*                        | -2.33, -0.62 | 0.69*   | 0.28, 1.09   |
| Model 2           | -0.07                                | -0.18, 0.03 | 0.13*                         | 0.04, 0.22   | 0.23*   | 0.05, 0.41   | -0.02                          | -0.30, 0.26 | 0.31*                         | 0.12, 0.50   | 0.60*   | 0.18, 1.02   |

Model 1 is adjusted for age, sex, heritage, education, income, language preference, and study site; Model 2 is additionally adjusted for smoking, hypertension, diabetes, chronic kidney disease, alcohol use, depression, physical activity (total METs/week), and energy intake (except for in potassium density models).

We modeled 500 mg increments of potassium, 250 mg per 1000 kcal unit increments for potassium density, and 0.50 unit increments of sodium to potassium ratio (mmol/mmol)

\*Indicates estimate is statistically significant,  $p < 0.05$

Table S2: Demographic and clinical characteristics, SOLNAS, N=435

| Characteristic                                                | % or mean | SE   |
|---------------------------------------------------------------|-----------|------|
| Age, mean (SE)                                                | 41.5      | 1.0  |
| Female                                                        | 52.8      | 3.0  |
| Hispanic/Latino heritage                                      |           |      |
| Central American                                              | 7.5       | 1.6  |
| Cuban                                                         | 19.6      | 3.9  |
| Dominican                                                     | 15.9      | 3.9  |
| Mexican                                                       | 27.8      | 2.9  |
| Puerto Rican                                                  | 23.2      | 3.2  |
| South American                                                | 6.0       | 1.1  |
| < HS Education                                                | 30.0      | 2.8  |
| < \$20,000 Income                                             | 48.0      | 3.4  |
| Spanish language preference                                   | 71.5      | 3.6  |
| Nativity                                                      |           |      |
| Foreign born, < 10 years in the US                            | 28.8      | 3.7  |
| Foreign born, 10+ years in the US                             | 47.1      | 3.2  |
| US born                                                       | 24.2      | 3.4  |
| Current smoker                                                | 20.7      | 2.7  |
| Heavy drinker                                                 | 7.5       | 2.0  |
| Physical activity (total METS/week), mean (SE)                | 641.1     | 71.1 |
| Energy, Kcal, mean (SE)                                       | 2,481.0   | 31.8 |
| Alternative Healthy Eating Index-2010, mean (SE) <sup>1</sup> | 46.8      | 0.5  |
| Hypertension                                                  | 17.5      | 2.0  |
| Use of diuretic medication                                    | 5.1       | 1.2  |
| Diabetes                                                      | 7.2       | 1.5  |
| CESD <sup>2</sup> score, mean (SE)                            | 7.2       | 0.4  |

<sup>1</sup> Alternative Healthy Eating Index 2010 range: 0-110

<sup>2</sup>CESD: Center for Epidemiologic Studies Depression scale
